# Supplementary material
Source: HighWire-hosted journal article supplement (https://bjgpopen.org/highwire/filestream/3184/field_highwire_adjunct_files/0/G_10.3399bjgpopen20X101085_Supp.pdf)
Supplement: G_10.3399bjgpopen20X101085_Supp.pdf [file G_10.3399bjgpopen20X101085_Supp.pdf]

Supplementary Table S1: Correlations, bootstrapped, n=6451

|                                                          |                               | Number of<br>antibiotic<br>prescriptions | Child<br>gender | Psychosocial<br>vulnerability | Mother's<br>education<br>level | Father's<br>education<br>level | Income<br>quintiles |       |
|----------------------------------------------------------|-------------------------------|------------------------------------------|-----------------|-------------------------------|--------------------------------|--------------------------------|---------------------|-------|
| <b>Child gender</b>                                      | Pearson Correlation           | ,037**                                   |                 |                               |                                |                                |                     |       |
|                                                          | Sig. (2-tailed)               | ,003                                     |                 |                               |                                |                                |                     |       |
|                                                          | 95%<br>Confidence<br>Interval | Lower                                    | ,012            |                               |                                |                                |                     |       |
|                                                          |                               | Upper                                    | ,061            |                               |                                |                                |                     |       |
| <b>Psychosocial<br/>vulnerability</b>                    | Pearson Correlation           | ,035**                                   | -,027*          |                               |                                |                                |                     |       |
|                                                          | Sig. (2-tailed)               | ,005                                     | ,028            |                               |                                |                                |                     |       |
|                                                          | 95%<br>Confidence<br>Interval | Lower                                    | ,008            | -,052                         |                                |                                |                     |       |
|                                                          |                               | Upper                                    | ,059            | -,003                         |                                |                                |                     |       |
| <b>Mother's<br/>education level</b>                      | Pearson Correlation           | -,029*                                   | ,024            | -,225**                       |                                |                                |                     |       |
|                                                          | Sig. (2-tailed)               | ,019                                     | ,058            | ,000                          |                                |                                |                     |       |
|                                                          | 95%<br>Confidence<br>Interval | Lower                                    | -,054           | -,001                         | -,250                          |                                |                     |       |
|                                                          |                               | Upper                                    | -,005           | ,048                          | -,200                          |                                |                     |       |
| <b>Father's<br/>education level</b>                      | Pearson Correlation           | -,036**                                  | ,033**          | -,250**                       | ,351**                         |                                |                     |       |
|                                                          | Sig. (2-tailed)               | ,004                                     | ,008            | ,000                          | ,000                           |                                |                     |       |
|                                                          | 95%<br>Confidence<br>Interval | Lower                                    | -,061           | ,009                          | -,273                          | ,329                           |                     |       |
|                                                          |                               | Upper                                    | -,013           | ,057                          | -,227                          | ,376                           |                     |       |
| <b>Income<br/>quintiles</b>                              | Pearson Correlation           | -,047**                                  | ,029*           | -,191**                       | ,226**                         | ,239**                         |                     |       |
|                                                          | Sig. (2-tailed)               | ,000                                     | ,020            | ,000                          | ,000                           | ,000                           |                     |       |
|                                                          | 95%<br>Confidence<br>Interval | Lower                                    | -,073           | ,004                          | -,213                          | ,204                           | ,215                |       |
|                                                          |                               | Upper                                    | -,024           | ,054                          | -,166                          | ,249                           | ,262                |       |
| <b>Parent-<br/>reported<br/>infections 2-5<br/>years</b> | Pearson Correlation           | ,190**                                   | -,019           | ,028*                         | ,006                           | -,002                          | -,006               |       |
|                                                          | Sig. (2-tailed)               | ,000                                     | ,121            | ,023                          | ,657                           | ,850                           | ,648                |       |
|                                                          | 95%<br>Confidence<br>Interval | Lower                                    | ,163            | -,045                         | ,003                           | -,020                          | -,028               | -,029 |
|                                                          |                               | Upper                                    | ,217            | ,004                          | ,053                           | ,030                           | ,024                | ,019  |

\*\* . Correlation is significant at the 0.01 level (2-tailed).

\* . Correlation is significant at the 0.05 level (2-tailed).

c. Unless otherwise noted, bootstrap results are based on 1000 bootstrap samples
